# Supplementary material
Source: HighWire-hosted journal article supplement (https://erj.ersjournals.com/content/56/2/2001754)
Supplement: inline-supplementary-material-1 [file inline-supplementary-material-1.pdf]

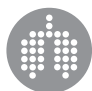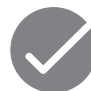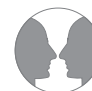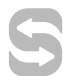

SHAREABLE PDF

# Functional characteristics of patients with SARS-CoV-2 pneumonia at 30 days post-infection

Justine Frija-Masson <sup>1,2</sup>, Marie-Pierre Debray<sup>3,4</sup>, Marie Gilbert<sup>5</sup>, François-Xavier Lescure<sup>5,6</sup>, Florence Travert<sup>7</sup>, Raphaël Borie <sup>4,8</sup>, Antoine Khalil<sup>3,4</sup>, Bruno Crestani<sup>4,8</sup>, Marie-Pia d'Ortho<sup>1,2</sup> and Catherine Bancal<sup>1</sup>

**Affiliations:** <sup>1</sup>Physiologie-Explorations Fonctionnelles, FHU APOLLO, Assistance Publique Hôpitaux de Paris, Hôpital Bichat-Claude Bernard, Paris, France. <sup>2</sup>Université de Paris, Inserm U 1141, Paris, France. <sup>3</sup>Assistance Publique Hôpitaux de Paris, Hôpital Bichat Claude Bernard, Service de radiologie, Paris, France. <sup>4</sup>Université de Paris, Inserm U 1152, Paris, France. <sup>5</sup>Assistance Publique Hôpitaux de Paris, Hôpital Bichat Claude Bernard, Service de maladies infectieuses et tropicales, Paris, France. <sup>6</sup>Université de Paris, Inserm U 1137, Paris, France. <sup>7</sup>Assistance Publique Hôpitaux de Paris, Hôpital Bichat Claude Bernard, Service d'endocrinologie, Paris, France. <sup>8</sup>Assistance Publique Hôpitaux de Paris, Hôpital Bichat Claude Bernard, Service de pneumologie, Paris, France.

**Correspondence:** Justine Frija-Masson, Service de Physiologie, Hôpital Bichat Claude Bernard, 46 rue Henri Huchard, 75018 Paris, France. E-mail: justine.frija@aphp.fr

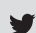

@ERSpublications

**More than half of patients with COVID-19 pneumonia exhibit abnormal lung function 30 days after symptom onset, without clear relationship with pneumonia extent on chest CT. This pleads for systematic and long-term follow-up of patients with COVID-19.** <https://bit.ly/2TFMPqE>

**Cite this article as:** Frija-Masson J, Debray M-P, Gilbert M, *et al.* Functional characteristics of patients with SARS-CoV-2 pneumonia at 30 days post-infection. *Eur Respir J* 2020; 56: 2001754 [<https://doi.org/10.1183/13993003.01754-2020>].

This single-page version can be shared freely online.

*To the Editor:*

We read with great interest the series of cases reported by Mo *et al.* [1], describing pulmonary function after severe acute respiratory syndrome coronavirus 2 (SARS-CoV-2) infection in hospitalised patients. The authors describe a significant correlation between diffusing capacity of the lung for carbon monoxide ( $D_{LCO}$ ) and clinically defined pneumonia severity.
